# Supplementary material
Source: MDPI journal article supplement (https://www.mdpi.com/2071-1050/13/10/5606)
Supplement: s1 [file s1]

## Technification in dairy farms may reconcile habitat conservation in a Brazilian savanna region

Juliana Silveira dos Santos, Fausto Miziara, Hayla da Silva Fernandes, Renato Cezar Miranda, Rosane Garcia Collevatti

### Supplementary A – Tables

**Table S1.** Characterization of the 25 dairy farms in the COFA-LTER long-term project. Numbers from 1 to 25 correspond to the dairy farm boundaries in Fig. B1 Appendix B. IIC is the Integral Index of Connectivity (for 100, 300, 500 and 1000 m dispersal distances, and mean value). Nd, not declared (farmer did not respond to the question). Size class corresponds to the fiscal module for the study region (1 module = 1 ha). A, family farm (< 30 ha); B, small farms; C, medium; D, large.

| Farm | Farm area (ha) | Size class | Natural vegetation (ha) | % Natural vegetation | IIC 100 | IIC 300 | IIC 500 | IIC 1000 | IIC Mean | Legal reserve area (ha) | % Legal reserve | Daily milk production (l) |
|------|----------------|------------|-------------------------|----------------------|---------|---------|---------|----------|----------|-------------------------|-----------------|---------------------------|
| 1    | 143.472        | C          | 66.793                  | 46.555               | 0.214   | 0.214   | 0.214   | 0.214    | 0.214    | 35.400                  | 0.20            | 250.0                     |
| 2    | 49.917         | B          | 7.603                   | 15.231               | 0.023   | 0.023   | 0.023   | 0.023    | 0.023    | 12.900                  | 0.20            | 1425.0                    |
| 3    | 31.433         | B          | 3.669                   | 11.672               | 0.015   | 0.015   | 0.015   | 0.015    | 0.015    | 1.200                   | 0.20            | 200.0                     |
| 4    | 9.838          | A          | 1.809                   | 18.384               | 0.026   | 0.026   | 0.026   | 0.026    | 0.026    | 1.920                   | 0.20            | 220.0                     |
| 5    | 73.781         | B          | 23.053                  | 31.245               | 0.097   | 0.097   | 0.097   | 0.097    | 0.097    | 1.960                   | 0.20            | 115.0                     |
| 6    | 237.038        | C          | 96.282                  | 40.619               | 0.160   | 0.162   | 0.162   | 0.162    | 0.161    | 49.000                  | 0.80            | 300.0                     |
| 7    | 70.570         | B          | 3.823                   | 5.417                | 0.002   | 0.002   | 0.002   | 0.002    | 0.002    | nd                      | nd              | 90.0                      |
| 8    | 68.440         | B          | 12.853                  | 18.780               | 0.027   | 0.029   | 0.029   | 0.029    | 0.029    | 14.000                  | 0.19            | 1000.0                    |
| 9    | 16.756         | A          | 3.831                   | 22.863               | 0.018   | 0.034   | 0.035   | 0.035    | 0.031    | 3.360                   | 0.20            | 35.0                      |

|                |         |   |         |        |       |       |       |       |       |         |      |        |
|----------------|---------|---|---------|--------|-------|-------|-------|-------|-------|---------|------|--------|
| <b>10</b>      | 32.812  | B | 6.816   | 20.773 | 0.037 | 0.037 | 0.037 | 0.037 | 0.037 | 7.200   | 0.18 | 940.0  |
| <b>11</b>      | 218.188 | C | 28.924  | 13.257 | 0.015 | 0.016 | 0.016 | 0.016 | 0.016 | 43.200  | 0.20 | 600.0  |
| <b>12</b>      | 15.958  | A | 3.934   | 24.654 | 0.065 | 0.065 | 0.065 | 0.065 | 0.065 | 3.360   | 0.20 | 300.0  |
| <b>13</b>      | 48.718  | B | 15.172  | 31.143 | 0.075 | 0.076 | 0.076 | 0.076 | 0.076 | 7.680   | 0.20 | 480.0  |
| <b>14</b>      | 26.321  | A | 4.630   | 17.589 | 0.026 | 0.029 | 0.029 | 0.029 | 0.028 | 4.800   | 0.20 | 40.0   |
| <b>15</b>      | 33.075  | B | 8.283   | 25.043 | 0.034 | 0.040 | 0.040 | 0.040 | 0.039 | 6.720   | 0.20 | 100.0  |
| <b>16</b>      | 61.928  | B | 24.746  | 39.959 | 0.108 | 0.112 | 0.112 | 0.112 | 0.111 | 12.000  | 0.20 | 8.0    |
| <b>17</b>      | 38.263  | B | 5.267   | 13.765 | 0.014 | 0.014 | 0.015 | 0.015 | 0.014 | 7.680   | 0.20 | 40.0   |
| <b>18</b>      | 5.264   | A | 2.145   | 40.758 | 0.129 | 0.129 | 0.129 | 0.129 | 0.129 | 7.680   | 0.20 | 400.0  |
| <b>19</b>      | 102.481 | B | 27.103  | 26.446 | 0.065 | 0.065 | 0.065 | 0.065 | 0.065 | 22.800  | 0.20 | 3200.0 |
| <b>20</b>      | 391.035 | C | 108.084 | 27.640 | 0.053 | 0.057 | 0.057 | 0.058 | 0.056 | 96.000  | 0.40 | 150.0  |
| <b>21</b>      | 7.103   | A | 2.799   | 39.401 | 0.155 | 0.155 | 0.155 | 0.155 | 0.155 | 1.500   | 0.20 | 16.0   |
| <b>22</b>      | 10.814  | A | 3.885   | 35.924 | 0.116 | 0.116 | 0.116 | 0.116 | 0.116 | 2.000   | 0.20 | 30.0   |
| <b>23</b>      | 710.943 | D | 231.450 | 32.555 | 0.083 | 0.084 | 0.084 | 0.084 | 0.084 | 133.000 | 0.33 | 1200.0 |
| <b>24</b>      | 34.377  | B | 3.078   | 8.954  | 0.009 | 0.011 | 0.011 | 0.011 | 0.011 | 6.800   | 0.20 | 700.0  |
| <b>25</b>      | 23.982  | A | 2.982   | 12.435 | 0.015 | 0.015 | 0.015 | 0.015 | 0.015 | 3.800   | 0.20 | 20.0   |
| <b>Mean</b>    | 98.500  |   | 27.960  | 24.842 | 0.063 | 0.065 | 0.065 | 0.065 | 0.065 | 20.248  |      | 474.4  |
| <b>Minimum</b> | 5.264   |   | 1.809   | 5.417  | 0.002 | 0.002 | 0.002 | 0.002 | 0.002 | 1.200   |      | 8.0    |
| <b>Maximum</b> | 710.943 |   | 231.450 | 46.555 | 0.214 | 0.214 | 0.214 | 0.214 | 0.214 | 133.000 |      | 3200.0 |
| <b>SD</b>      | 155.775 |   | 51.185  | 11.448 | 0.057 | 0.056 | 0.056 | 0.056 | 0.056 | 32.308  |      | 695.2  |
| <b>Median</b>  | 38.263  |   | 6.816   | 24.654 | 0.037 | 0.040 | 0.040 | 0.040 | 0.039 | 7.440   |      | 220.0  |

**Table S2.** Outcomes of the variables related to the level of technification and overall milking management characteristics in dairy farms in COFA-LTER landscape. For details of each variable possible outcome (1 to 5) see Table 1 in the main text. Variables with total < 25 have missing data (the farmer did not respond).

| Variable                        | Number of outcomes |    |    |   |   | Total |
|---------------------------------|--------------------|----|----|---|---|-------|
|                                 | 1                  | 2  | 3  | 4 | 5 |       |
| Primary forage diet             | 10                 | 1  | 12 | 2 | - | 25    |
| Fertilizer pasture management   | 17                 | 7  | -  | - | - | 24    |
| Time of supplementary feed      | 8                  | 16 | -  | - | - | 24    |
| Pasture restoration             | 15                 | 9  | -  | - | - | 24    |
| Criterion to supplement         | 0                  | 6  | 11 | 8 | - | 25    |
| Add vitamins to supplement      | 14                 | 11 | -  | - | - | 25    |
| Milking method                  | 6                  | 11 | 7  | - | - | 24    |
| Milking frequency               | 9                  | 15 | 1  | - | - | 25    |
| Farm infrastructure for milking | 10                 | 8  | 5  | 2 | 0 | 25    |

|                                            |    |    |    |    |   |    |
|--------------------------------------------|----|----|----|----|---|----|
| <b>Milk cooling tank</b>                   | 1  | 18 | 6  | -  | - | 25 |
| <b>Milk quality-based payment</b>          | 16 | 9  | -  | -  | - | 25 |
| <b>Cleaning of udder before milking</b>    | 5  | 6  | 14 | -  | - | 25 |
| <b>CMT test</b>                            | 2  | 2  | 8  | 11 | 1 | 24 |
| <b>Breeding program for productivity</b>   | 10 | 15 | -  | -  | - | 25 |
| <b>Selective breeding method</b>           | 16 | 9  | -  | -  | - | 25 |
| <b>Pregnancy diagnosis</b>                 | 5  | 14 | 6  | -  | - | 25 |
| <b>Cattle breed composition</b>            | 10 | 0  | 5  | 10 | - | 25 |
| <b>Management separating pregnant cows</b> | 9  | 16 | -  | -  | - | 25 |

---

**Table S3.** Collinearity among variables related to the level of technification in dairy farms in COFA-LTER landscape. CMT is the California Mastitis Test. Gvif is the generalized variance-inflation factor. In bold, values of Gvif > 5.0, variables were excluded for the next step of Gvif analysis.

| Group/Variable                                                | Gvif         | df | Gvif <sup>^(1/(2*df))</sup> |
|---------------------------------------------------------------|--------------|----|-----------------------------|
| <b>Feed management Step 1</b>                                 |              |    |                             |
| primary forage diet                                           | <b>8.974</b> | 3  | 1.442                       |
| fertilizer pasture management                                 | 3.142        | 2  | 1.331                       |
| time of supplementary feed                                    | 2.959        | 2  | 1.312                       |
| criterium to supplement                                       | 3.184        | 2  | 1.336                       |
| add vitamins to supplement                                    | 2.600        | 1  | 1.612                       |
| <b>Feed management Step 2 (excluding primary forage diet)</b> |              |    |                             |
| fertilizer pasture management                                 | 2.041        | 2  | 1.195                       |
| time of supplementary feed                                    | 1.479        | 2  | 1.103                       |
| criterium to supplement                                       | 1.866        | 2  | 1.169                       |
| add vitamins to supplement                                    | 1.767        | 1  | 1.329                       |
| <b>Milking management Step 1</b>                              |              |    |                             |
| milking method                                                | <b>5.093</b> | 3  | 1.312                       |
| milking frequency                                             | 3.310        | 2  | 1.349                       |
| farm infrastructure for milking                               | 3.956        | 3  | 1.258                       |
| <b>Milking management Step 2 (excluding milking method)</b>   |              |    |                             |

|                                                      |       |   |       |
|------------------------------------------------------|-------|---|-------|
| <b>milking frequency</b>                             | 2.243 | 2 | 1.224 |
| <b>farm infrastructure for milking</b>               | 2.243 | 3 | 1.144 |
| <b>Sanitary control</b>                              |       |   |       |
| <b>cleaning of udder before milking</b>              | 2.053 | 2 | 1.197 |
| <b>CMT</b>                                           | 2.053 | 5 | 1.075 |
| <b>Genetics and breeding</b>                         |       |   |       |
| <b>Breeding program for productivity improvement</b> | 2.553 | 1 | 1.598 |
| <b>selective breeding method</b>                     | 2.757 | 1 | 1.661 |
| <b>pregnancy diagnosis</b>                           | 2.264 | 2 | 1.227 |

**Table S4.** Models of technification to explain variation in percentage of natural vegetation among dairy farms, analyzed per group of explanatory variables. RSS, residual sum of square; AIC, Akaike Information Criterion; SE, standard error. \* significant ( $p < 0.05$ ).

| <b>Group/Variable</b>                                | <b>df</b> | <b>Sum of Square</b> | <b>RSS</b> | <b>AIC</b> | <b>p</b> |
|------------------------------------------------------|-----------|----------------------|------------|------------|----------|
| <b>Feed management</b>                               |           |                      |            |            |          |
| <b>null model</b>                                    |           |                      | 2955.1     | 135.31     |          |
| <b>fertilizer pasture management</b>                 | 2         | 6.226                | 2961.3     | 131.36     | 0.974    |
| <b>time of supplementary feed</b>                    | 2         | 33.211               | 2988.3     | 131.59     | 0.869    |
| <b>criterium to supplement</b>                       | 2         | 133.271              | 3088.4     | 132.41     | 0.576    |
| <b>add vitamins to supplement</b>                    | 1         | 0.003                | 2955.1     | 133.31     | 0.996    |
| <b>Milking management</b>                            |           |                      |            |            |          |
| <b>null model</b>                                    |           |                      | 2716.2     | 129.20     |          |
| <b>milking frequency</b>                             | 2         | 54.55                | 2770.7     | 125.70     | 0.779    |
| <b>farm infrastructure for milking</b>               | 3         | 425.22               | 3141.4     | 126.84     | 0.304    |
| <b>Sanitary control</b>                              |           |                      |            |            |          |
| <b>null model</b>                                    |           |                      | 2364.3     | 129.73     |          |
| <b>cleaning of udder before milking</b>              | 2         | 168.73               | 2533.0     | 127.46     | 0.423    |
| <b>CMT</b>                                           | 5         | 480.62               | 2844.9     | 124.36     | 0.463    |
| <b>Genetics and breeding</b>                         |           |                      |            |            |          |
| <b>null model</b>                                    |           |                      | 2293.2     | 122.97     |          |
| <b>breeding program for productivity improvement</b> | 1         | 504.32               | 2797.5     | 125.94     | 0.026*   |

|                                  |                 |           |          |          |        |
|----------------------------------|-----------------|-----------|----------|----------|--------|
| <b>selective breeding method</b> | 1               | 430.89    | 2724.0   | 125.28   | 0.038* |
| <b>pregnancy diagnosis</b>       | 2               | 314.89    | 2608.1   | 122.19   | 0.200  |
| <hr/>                            |                 |           |          |          |        |
| <b>Daily milk production</b>     |                 |           |          |          |        |
|                                  | <b>Estimate</b> | <b>SE</b> | <b>t</b> | <b>p</b> |        |
| <b>intercept</b>                 | 25.365          | 2.844     | 8.919    | 6.32e-09 |        |
| <b>daily milk production</b>     | -0.001          | 0.003     | -0.321   | 0.751    |        |
| <hr/>                            |                 |           |          |          |        |



**Table S5.** Models of technification to explain variation in mean IIC among dairy farms, analyzed per group of explanatory variables. RSS, residual sum of square; AIC, Akaike Information Criterion; SE, standar error. \*\* marginally significant ( $p < 0.10$ ).

| <b>Group/Variable</b>                         | <b>df</b> | <b>Sum of Square</b> | <b>RSS</b> | <b>AIC</b> | <b>p</b> |
|-----------------------------------------------|-----------|----------------------|------------|------------|----------|
| <b>Feed management</b>                        |           |                      |            |            |          |
| null model                                    |           |                      | 0.072347   | -130.13    |          |
| fertilizer pasture management                 | 2         | 2.5e-05              | 0.072373   | -134.12    | 0.996    |
| time of supplementary feed                    | 2         | 1.7e-05              | 0.072521   | -134.07    | 0.971    |
| criterium to supplement                       | 2         | 1.2e-05              | 0.073566   | -133.71    | 0.812    |
| add vitamins to supplement                    | 1         | 8.9e-04              | 0.073242   | -131.82    | 0.579    |
| <b>Milking management</b>                     |           |                      |            |            |          |
| null model                                    |           |                      | 0.061      | -138.37    |          |
| milking frequency                             | 2         | 0.002                | 0.063      | -141.50    | 0.646    |
| farm infrastructure for milking               | 3         | 0.015                | 0.076      | -138.79    | 0.134    |
| <b>Sanitary control</b>                       |           |                      |            |            |          |
| null model                                    |           |                      | 0.059      | -135.30    |          |
| cleaning of udder before milking              | 2         | 0.004                | 0.063      | -137.53    | 0.412    |
| CMT                                           | 5         | 0.012                | 0.071      | -140.51    | 0.442    |
| <b>Genetics and breeding</b>                  |           |                      |            |            |          |
| null model                                    |           |                      | 0.059      | -141.12    |          |
| breeding program for productivity improvement | 1         | 0.006                | 0.065      | -140.90    | 0.136    |

|                                  |                 |           |          |          |         |
|----------------------------------|-----------------|-----------|----------|----------|---------|
| <b>selective breeding method</b> | 1               | 0.008     | 0.068    | -139.85  | 0.071** |
| <b>pregnancy diagnosis</b>       | 2               | 0.009     | 0.068    | -141.75  | 0.185   |
| <hr/>                            |                 |           |          |          |         |
| <b>Daily milk production</b>     |                 |           |          |          |         |
|                                  | <b>Estimate</b> | <b>SE</b> | <b>t</b> | <b>p</b> |         |
| <b>intercept</b>                 | 0.0683          | 0.014     | 4.923    | 5.65e-05 |         |
| <b>daily milk production</b>     | -7.881e-06      | 1.673e-05 | -0.471   | 0.642    |         |
| <hr/>                            |                 |           |          |          |         |
| <b>Final model</b>               |                 |           |          |          |         |
| <b>Selective breeding method</b> | 1               | 0.003     | 0.075    | -141.33  | 0.303   |
| <b>Daily milk production</b>     | 1               | 0.003     | 0.076    | -141.35  | 0.309   |
| <hr/>                            |                 |           |          |          |         |

**Table S6.** Association between selective breeding method and the variables related to the level of technification and overall milking management characteristics in dairy farms in COFA-LTER landscape. For details of each variable see Table 1. \* significant ( $p < 0.05$ ).

| <b>Variable</b>                      | <b>Kendall's Tau-b</b> | <b>p</b> |
|--------------------------------------|------------------------|----------|
| <b>Primary forage diet</b>           | 0.583                  | 0.001*   |
| <b>Fertilizer pasture management</b> | -0.259                 | 0.898    |
| <b>Time of supplementary feed</b>    | -0.426                 | 0.985    |
| <b>Pasture restoration</b>           | -0.183                 | 0.814    |
| <b>Criterion to supplement</b>       | -0.381                 | 0.978    |
| <b>Add vitamins to supplement</b>    | -0.329                 | 0.950    |
| <b>Milking method</b>                | 0.669                  | <0.001*  |
| <b>Milking frequency</b>             | 0.582                  | 0.002*   |

|                                            |        |        |
|--------------------------------------------|--------|--------|
| <b>Farm infrastructure for milking</b>     | -0.663 | 0.999  |
| <b>Milk cooling tank</b>                   | -0.326 | 0.951  |
| <b>Milk quality-based payment</b>          | -0.389 | 0.974  |
| <b>Cleaning of udder before milking</b>    | 0.418  | 0.014* |
| <b>CMT test</b>                            | -0.153 | 0.797  |
| <b>Breeding program for productivity</b>   | -0.748 | 0.999  |
| <b>Pregnancy diagnosis</b>                 | -0.639 | 0.999  |
| <b>Cattle breed composition</b>            | -0.530 | 0.997  |
| <b>Management separating pregnant cows</b> | -0.653 | 0.999  |

---

**Table S7.** Collinearity among variables related to dairy farm environment features in the COFA-LTER. Vif is the variance-inflation factor. In bold, values of Vif > 5.0, variables that were excluded for the next step of Vif analysis.

| <b>Variable</b>                                     | <b>Vif</b>   |
|-----------------------------------------------------|--------------|
| <b>Step 1</b>                                       |              |
| <b>Slope</b>                                        | 1.263        |
| <b>Percentage of riparian forest</b>                | 1.991        |
| <b>Percentage of agriculture</b>                    | <b>7.945</b> |
| <b>Percentage of pasture</b>                        | <b>7.252</b> |
| <b>Step 2 (excluding percentage of agriculture)</b> |              |
| <b>Slope</b>                                        | 1.262        |
| <b>Percentage of riparian forest</b>                | 1.071        |
| <b>Percentage of pasture</b>                        | 1.192        |

**Table S8.** Models of environment features to explain variation in percentage of natural vegetation among dairy farms. RSS, residual sum of square; AIC, Akaike Information Criterion. \*\* significant ( $p < 0.05$ ). \* marginally significant ( $p < 0.10$ ).

| <b>Model</b>                         | <b>df</b> | <b>Sum of<br/>Square</b> | <b>RSS</b> | <b>AIC</b> | <b>p</b>     |
|--------------------------------------|-----------|--------------------------|------------|------------|--------------|
| <b>Slope</b>                         | 1         | 51.03                    | 1167.3     | 108.09     | 0.290        |
| <b>Percentage of riparian forest</b> | 1         | 1444.50                  | 2560.8     | 127.73     | 5.8212e-06** |
| <b>Percentage of pasture</b>         | 1         | 112.41                   | 1228.7     | 109.37     | 0.121        |
| <b>Size of rural property</b>        | 3         | 369.49                   | 1485.8     | 110.12     | 0.067*       |
| <b>Final model</b>                   |           |                          |            |            |              |
| <b>Percentage of riparian forest</b> | 1         | 1420.24                  | 2652.5     | 124.61     | 1.198e-05**  |
| <b>Size of rural property</b>        | 3         | 483.08                   | 1715.3     | 109.71     | 0.041**      |

**Table S9.** Models of environment features to explain variation in IIC among dairy farms. RSS, residual sum of square; AIC, Akaike Information Criterion. \* significant ( $p < 0.05$ ).

| <b>Model</b>                         | <b>df</b> | <b>Sum of<br/>Square</b> | <b>RSS</b> | <b>AIC</b> | <b>p</b>   |
|--------------------------------------|-----------|--------------------------|------------|------------|------------|
| <b>Slope</b>                         | 1         | 0.0018                   | 0.0278     | -158.02    | 0.189      |
| <b>Percentage of riparian forest</b> | 1         | 0.0328                   | 0.0587     | -139.34    | 6.287e-06* |
| <b>Percentage of pasture</b>         | 1         | 0.0026                   | 0.0286     | -157.31    | 0.119      |
| <b>Size of rural property</b>        | 3         | 0.0121                   | 0.0380     | -154.20    | 0.023*     |
| <b>Final model</b>                   |           |                          |            |            |            |
| <b>Percentage of riparian forest</b> | 1         | 0.0314                   | 0.0603     | -142.66    | 1.851e-05* |
| <b>Size of rural property</b>        | 3         | 0.0139                   | 0.0429     | -155.16    | 0.019*     |

**Technification in dairy farms may reconcile habitat conservation in a Brazilian savanna  
region**

Juliana Silveira dos Santos, Fausto Miziara, Hayla da Silva Fernandes, Renato Cezar

Miranda, Rosane Garcia Collevatti

---

**Supplementary B – Figure**



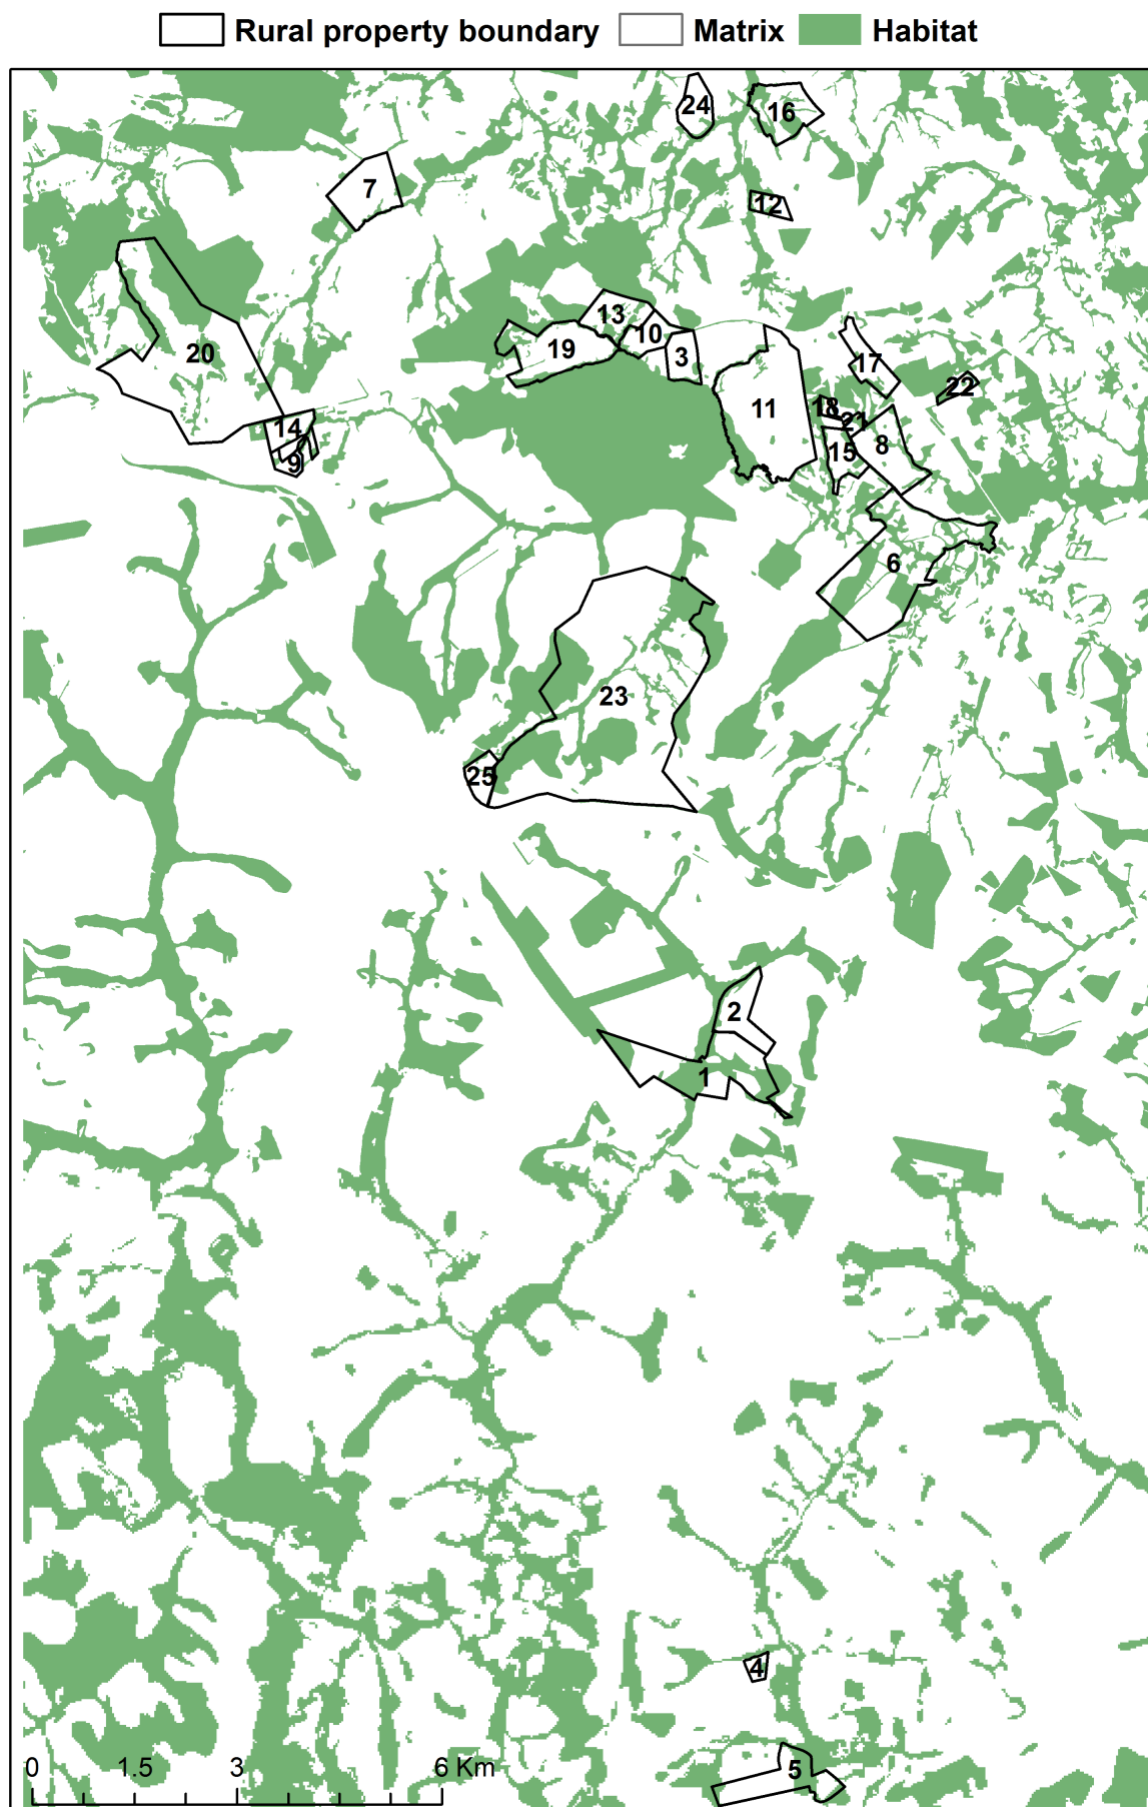

**Fig. S1** Spatial distribution of the 25 dairy farms in the COFA-LTER landscape showing the farm boundaries. Numbers from 1 to 25 correspond to the dairy farm boundaries. Green corresponds to natural vegetation land cover (habitat) and white to anthropic land cover (matrix).

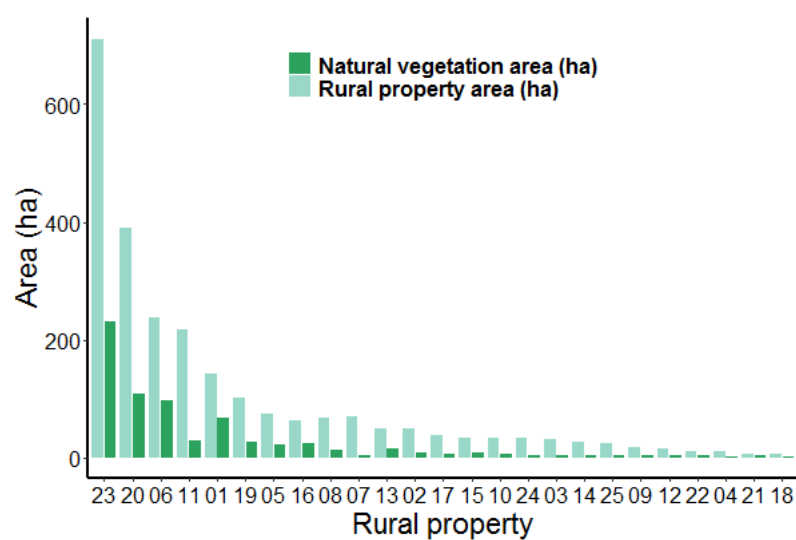

**Fig. S2** Distribution of dairy farm size and natural vegetation in the COFA-LTER landscape.

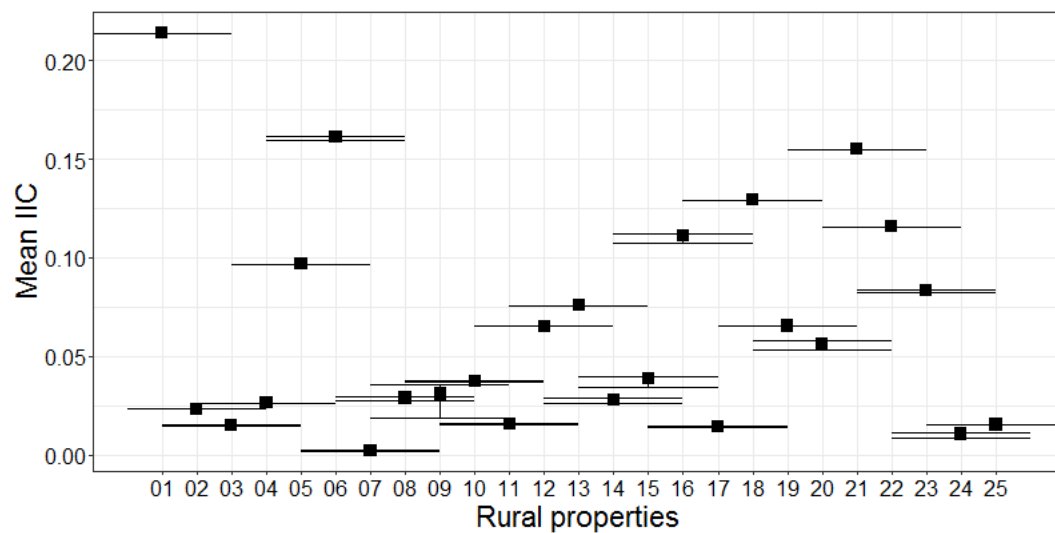

**Figure S3** Integral Index of Connectivity (IIC) in the 25 dairy farms in the COFA-LTER landscape. The square and central bar show the mean IIC calculated for the three distances: 300 m, 500 m and 1000 m each farm. The low bar represents the minimum value and the above bar shows the maximum value of IIC among the three distances.
